# Supplementary material for: Lumbar extension peak-torque, muscle endurance and motor imagery in junior-elite basketballers with and without a history of low back pain: a pilot study
Source: PeerJ. 2024 Jun 6;12:e17508. doi: 10.7717/peerj.17508 (PMC11162610; doi:10.7717/peerj.17508)
Supplement: Supplemental Information 1 [file peerj-12-17508-s001.xlsx]

## Sheet: No Lx Pain
								HAND								Lx
	R1 (Nm)	R2 (Nm)	% difference R1 v R2	AVERAGE		BS TIME (sec)	LX PAIN HISTORY	L) time (sec)	L) accuracy (%)	R) time (sec)	R) accuracy (%)	TIME TOTAL	TIME AVE	ACC TOTAL	ACC AVE	L) time	L) accuracy	R) time	R) accuracy	TIME TOTAL	TIME AVE	ACC TOTAL	ACC AVE	Accuracy difference	Time difference
3	549	487	-12.731	518		60	NO	1.2	40	2.5	75	3.7	1.85	115	57.5	1.4	90	1.7	90	3.1	1.55	180	90	0	0.3
5	511	428	-19.3925	469.5		42	NO	2	80	2.8	90	4.8	2.4	170	85	1.3	95	1.4	100	2.7	1.35	195	97.5	5	0.1
6	640	536	-19.403	588		96	NO	1.2	80	1.6	90	2.8	1.4	170	85	1	95	1.1	90	2.1	1.05	185	92.5	5	0.1
7	630	534	-17.9775	582		102	NO	1.2	85	1.3	85	2.5	1.25	170	85	0.9	75	1.2	90	2.1	1.05	165	82.5	15	0.3
8	593	492	-20.5285	542.5		91	NO	2.2	85	2.3	90	4.5	2.25	175	87.5	1.5	90	1.1	95	2.6	1.3	185	92.5	5	0.4
9	694	581	-19.4492	637.5		124	NO	1.3	55	2.2	85	3.5	1.75	140	70	1.1	95	1.1	100	2.2	1.1	195	97.5	5	0
15	665	558	-19.1756	611.5		105	NO	2.8	75	1.7	60	4.5	2.25	135	67.5	1.3	85	1.1	90	2.4	1.2	175	87.5	5	0.2
18	638	547	-16.6362	592.5		109	NO	1.7	80	1.9	75	3.6	1.8	155	77.5	1.3	85	1.1	90	2.4	1.2	175	87.5	5	0.2
19	602	522	-15.3257	562		78	NO	1.2	65	1.4	75	2.6	1.3	140	70	1.5	95	1.3	90	2.8	1.4	185	92.5	5	0.2

## Sheet: Lx Pain
								HAND								Lx
	R1 (Nm)	R2 (Nm)	% difference R1 v R2	AVERAGE		BS TIME (sec)	LX PAIN HISTORY	L) time (sec)	L) accuracy (%)	R) time (sec)	R) accuracy (%)	TIME TOTAL	TIME AVE	ACC TOTAL	ACC AVE	L) time	L) accuracy	R) time	R) accuracy	TIME TOTAL	TIME AVE	ACC TOTAL	ACC AVE	Accuracy difference	Time difference
1	420	381	-10.2362	400.5		24	YES	1.4	80	1.8	85	3.2	1.6	165	82.5	1.4	90	1.6	80	3	1.5	170	85	10	0.2
2	524	443	-18.2844	483.5		41	YES	1.7	75	2.3	80	4	2	155	77.5	1.2	80	1.3	90	2.5	1.25	170	85	10	0.1
4	499	401	-24.4389	450		28	YES	2	55	2.7	65	4.7	2.35	120	60	1.7	100	1.3	80	3	1.5	180	90	20	0.4
10	520	439	-18.451	479.5		24	YES	2.1	95	2.3	95	4.4	2.2	190	95	1.4	100	1.3	85	2.7	1.35	185	92.5	15	0.1
11	534	432	-23.6111	483		49	YES	1.9	60	2.2	75	4.1	2.05	135	67.5	1	65	1.2	75	2.2	1.1	140	70	10	0.2
12	512	435	-17.7011	473.5		41	YES	1.7	85	1.2	65	2.9	1.45	150	75	0.9	75	1.4	90	2.3	1.15	165	82.5	15	0.5
13	514	401	-28.1796	457.5		32	YES	1.5	90	2.2	95	3.7	1.85	185	92.5	1.8	80	1.5	95	3.3	1.65	175	87.5	15	0.3
14	503	427	-17.7986	465		14	YES	3	90	2	75	5	2.5	165	82.5	1.2	80	1.8	100	3	1.5	180	90	20	0.6
16	507	430	-17.907	468.5		27	YES	1.6	85	1.2	70	2.8	1.4	155	77.5	1.4	95	1.2	80	2.6	1.3	175	87.5	15	0.2
17	541	462	-17.0996	501.5		51	YES	1.4	75	1.5	70	2.9	1.45	145	72.5	0.9	75	1.3	85	2.2	1.1	160	80	10	0.4
20	552	481	-14.7609	516.5		51	YES	2.3	85	2	80	4.3	2.15	165	82.5	1.1	85	1.6	75	2.7	1.35	160	80	10	0.5
